# Supplementary material for: Identification of the Regulatory Region Responsible for Vascular Tissue–Specific Expression in the Rice Hd3a Promoter
Source: PubMed Central journal article supplement — Mol Cells. 2018 Feb 28;41(4):342–50. doi: 10.14348/molcells.2018.2320 (PMC5935103; doi:10.14348/molcells.2018.2320), 2018-02-28

**Supplementary Table S1. List of primers used in this study**

**Primers for transgenic plants**

| <b>Primer name</b> | <b>Sequence (5'-3')</b>          |
|--------------------|----------------------------------|
| Hd3a_1597_F_KpnI   | CGCGGTACCTTTACTCACTCTCTTGTATAG   |
| Hd3a_1597_R_BamHI  | GCGGATCCGCGGTGACCATGGACGGCTTGA   |
| Hd3a_445_F_KpnI    | CGCGGTACAGATCTAGACTGAACTACTATAGC |
| Hd3a_445_R_BamHI   | GCGGATCCGCGGTGACCATGGACGGCTTGA   |
| Hd3a_245_F_KpnI    | CGCGGTACCCGCCATCGATGCGTGACCA     |
| Hd3a_245_R_BamHI   | GCGGATCCGCGGTGACCATGGACGGCTTGA   |
| Hd3a_45_F_KpnI     | CGCGGTACCTAAAGCGGCCATCTCACTCTC   |
| Hd3a_45_R_BamHI    | GCGGATCCGCGGTGACCATGGACGGCTTGA   |

**Primers for genotyping of transgenic plants**

|          |                       |
|----------|-----------------------|
| Hd3a_G_F | GGTCACCTATGGCTCCAAGA  |
| GUS_G_R  | TCTTGCCGTTTTTCGTCGGTA |

**Primers for qRT-PCR**

|        |                      |
|--------|----------------------|
| Ubi1_F | TGAAGACCCTGACTGGGAAG |
| Ubi1_R | CACGGTTCAACAACATCCAG |
| Hd3a_F | AGCCCAAGTGACCCTAACCT |
| Hd3a_R | GTTGTAGAGCTCGGCGAAGT |
| GUS_F  | CCAATGGTGATGTCAGCGTT |
| GUS_R  | ACAGCGAAGAGGCAGTCAAC |

**Supplementary Fig. S1.** GUS staining of longitudinal section of shoot apical meristem (SAM) of -1,445 (A), -445 (B), -245 (C), and -45 (D) *Hd3a* promoter-*GUS* transgenic at ZT 1 on 35 DAG. Scale bars = 50  $\mu\text{m}$ .

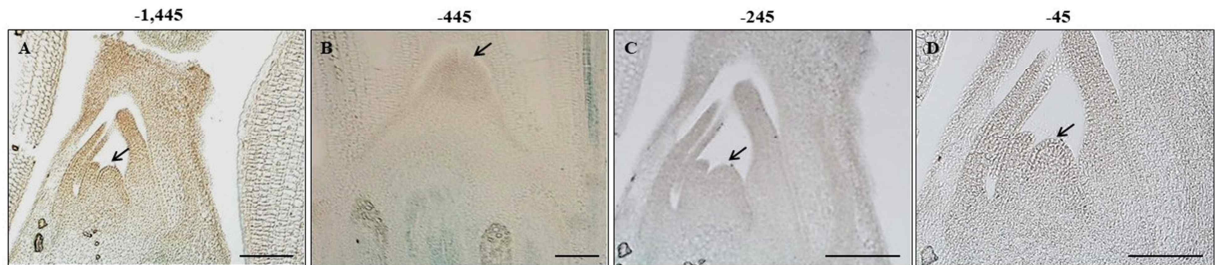

Supplement: molce-41-4-342-suppl.pdf [file molce-41-4-342-suppl.pdf]
